# Supplementary material for: Systematic literature review of adopting eHealth in pharmaceutical care during COVID-19 pandemic: recommendations for strengthening pharmacy services
Source: PubMed Central journal article supplement — BMJ Open. 2022 Nov 23;12(11):e066246. doi: 10.1136/bmjopen-2022-066246 (PMC9684285; doi:10.1136/bmjopen-2022-066246), 2022-11-23
Supplement: bmjopen-2022-066246supp001.pdf [file bmjopen-2022-066246supp001.pdf]

**Supplementary Table 1. Characteristics of sources of evidence**

|   | <b>Authors<br/>(Publication<br/>Year)</b> | <b>Type of<br/>study</b> | <b>Location</b>   | <b>Study aim</b>                                                                                                                                                                                                                             | <b>Targets of eHealth<br/>pharmacy service</b>                                                             | <b>Types of<br/>pharmacists<br/>involved</b>                               |
|---|-------------------------------------------|--------------------------|-------------------|----------------------------------------------------------------------------------------------------------------------------------------------------------------------------------------------------------------------------------------------|------------------------------------------------------------------------------------------------------------|----------------------------------------------------------------------------|
| 1 | Abdallah et al. (2020) <sup>20</sup>      | Descriptive study        | Qatar             | To share the experience and describe the measures adopted by the clinic as part of the Hamad Medical Corporation response to the emerging situation                                                                                          | Patients who were elderly or immunocompromised, and referred to the clinic or anticoagulation emergencies; | Hospital pharmacists                                                       |
| 2 | Do et al. (2021) <sup>23</sup>            | Descriptive study        | The United States | To discuss the objectives and strategies used by an ambulatory care action team operating within a large health system's pharmacy incident command structure during the initial response to the coronavirus disease 2019 (COVID-19) pandemic | Patients of the pulmonary clinic                                                                           | Hospital pharmacists                                                       |
| 3 | Goff et al. (2020) <sup>24</sup>          | Descriptive study        | The United States | To described how pharmacists from high and low-middle income countries contributed to essential patient care and well-being of the public during the COVID-19 pandemic                                                                       | General Public                                                                                             | Pharmacists specializing in infectious diseases (ID)                       |
| 4 | Liao et al. (2020) <sup>26</sup>          | Descriptive study        | China             | To described the roles and contributions of pharmacists in Shanghai during the coronavirus disease 2019 (COVID-19) pandemic                                                                                                                  | Adult patients with COVID-19                                                                               | Clinical pharmacists and pharmacists of traditional Chinese medicine (TCM) |
| 5 | Allison et al. (2021) <sup>21</sup>       | Descriptive study        | The United States | To evaluated how to balance the need to provide essential pharmacy services (both operational and clinical), develop telework strategies, and maintain a viable workforce for the duration of the COVID-19 pandemic                          | Inpatients and discharged patients                                                                         | Hospital pharmacists                                                       |

|    |                                                |                   |                   |                                                                                                                                                                                                                                                                             |                                                    |                                                       |
|----|------------------------------------------------|-------------------|-------------------|-----------------------------------------------------------------------------------------------------------------------------------------------------------------------------------------------------------------------------------------------------------------------------|----------------------------------------------------|-------------------------------------------------------|
| 6  | Margusino-Framiñán et al. (2020) <sup>28</sup> | Descriptive study | Spain             | To describe and analyze the experience of HPSs with outpatient Telepharmacy during the COVID-19 pandemic and exposed the lessons learned                                                                                                                                    | Outpatients                                        | Primary care pharmacists; Community Pharmacists       |
| 7  | Mohammad et al. (2020) <sup>29</sup>           | Descriptive study | The United States | To emphasize clinical and experiential challenges that ambulatory care clinical pharmacists had been facing, generate discussion, and provide examples of potential solutions that could serve as a framework for COVID-19 ambulatory care practices and experiential sites | Patients on warfarin therapy                       | Hospital pharmacists                                  |
| 8  | Reardon et al. (2020) <sup>30</sup>            | Descriptive study | Canada            | To describe the UBC Pharmacists Clinic's technical systems and lessons learned using enabling technology and the provision of virtual patient care by pharmacists                                                                                                           | Patients who needed to visit the pharmacist clinic | Hospital pharmacists                                  |
| 9  | Segal et al. (2020) <sup>31</sup>              | Descriptive study | The United States | To describe an expedited process used to obtain telehealth privileges for pharmacists and highlighted the experience providing clinical services to patients with COVID-19                                                                                                  | Patients with chronic conditions and cancer        | Hospital pharmacists                                  |
| 10 | Warda et al. (2021) <sup>32</sup>              | Descriptive study | The United States | To describe the uptake and impact of pharmacist-led virtual medication tours during telehealth visits in the CF clinic setting                                                                                                                                              | Patients with cystic fibrosis                      | Pharmacists specializing in cystic fibrosis           |
| 11 | Yerram et al. (2021) <sup>33</sup>             | Descriptive study | The United States | To present the approach of restructuring clinical pharmacy services and providing direct patient care in outpatient clinics during the pandemic                                                                                                                             | Outpatients; Inpatients                            | Hospital pharmacists                                  |
| 12 | Adam et al. (2021) <sup>34</sup>               | Case series       | Canada            | To share the experiences of the pharmacy department of the Centre hospitalier de l'Université de Montréal                                                                                                                                                                   | COVID-19 patients; Oncology outpatient             | Pharmacists in the oncology outpatient; PhT (the ones |

|    |                                         |                        |                            | (CHUM) in response to the COVID-19 pandemic                                                                                                                                                                                                                                                  |                                                                                                                                                         | responsible for prescription entry)            |
|----|-----------------------------------------|------------------------|----------------------------|----------------------------------------------------------------------------------------------------------------------------------------------------------------------------------------------------------------------------------------------------------------------------------------------|---------------------------------------------------------------------------------------------------------------------------------------------------------|------------------------------------------------|
| 13 | Al Mazrouei et al. (2021) <sup>35</sup> | Case series            | United Arab Emirates (UAE) | To investigate the frequency, nature, and clinical significance of pharmacist interventions on over-the-counter (OTC) medicines with abuse potential across community pharmacies with and without virtual care                                                                               | Patient who used over-the-counter medicines                                                                                                             | Community pharmacists; Hospital pharmacists    |
| 14 | Alhmod et al. (2021) <sup>36</sup>      | Cross-sectional survey | Qatar                      | To evaluate the impact of transitioning from clinic-based anticoagulation management services to drive-up and phone-based services during COVID-19 pandemic in Qatar                                                                                                                         | Patients who attended anticoagulation clinic over 1-year period (6 months before and 6 months after service transition)                                 | Pharmacists providing anticoagulation services |
| 15 | Chen et al. (2021) <sup>37</sup>        | Cross-sectional survey | China                      | To investigate the characteristics, acceptance, and initial impact of the Cloud SYSUCC app during a COVID-19 outbreak in a tertiary cancer hospital in China                                                                                                                                 | Patient with cancer treated with prescription medicines (such as breast cancer, liver cancer, and thyroid cancer) who needed to visit the cancer center | Hospital pharmacists                           |
| 16 | Li et al. (2021) <sup>38</sup>          | Cross-sectional survey | China                      | To retrieve and investigate the prevention and control measures of clinical pharmacists during the outbreak of novel coronavirus, summarize the roles and responsibilities of clinical pharmacists, and to propose innovative strategies for developing pharmacy services under the epidemic | Patients in Fangcang shelter hospitals                                                                                                                  | Hospital pharmacists                           |
| 17 | Livet et al. (2021) <sup>39</sup>       | Cross-sectional survey | The United States          | To describe the feasibility of expanding a comprehensive medication management (CMM) telepharmacy service to include social determinants of health(SDOH) support expanded service, evaluated stakeholders'                                                                                   | Diabetic patients with HbA1c > 9, at least one additional comorbidity, five or more medications, and at least 18 years of age                           | Hospital pharmacists                           |

|    |                                          |                     |                                          |                                                                                                                                                                                                                                                                                     |                                                                                                                                                                             |                                                                                                  |
|----|------------------------------------------|---------------------|------------------------------------------|-------------------------------------------------------------------------------------------------------------------------------------------------------------------------------------------------------------------------------------------------------------------------------------|-----------------------------------------------------------------------------------------------------------------------------------------------------------------------------|--------------------------------------------------------------------------------------------------|
|    |                                          |                     |                                          | experience with the service, and assessed short-term impact on patients with diabetes                                                                                                                                                                                               |                                                                                                                                                                             |                                                                                                  |
| 18 | Brown et al. (2021) <sup>40</sup>        | Retrospective study | The United States and the United Kingdom | To offer a template for other centers to develop their own new Cardio-Oncology clinics with Virtual-Hybrid Approach during the pandemic                                                                                                                                             | Patients with cancers (e.g., breast, prostate, leukemia, lung) or cardiovascular toxicities (e.g., cardiomyopathy, hypertension) who needed to visit Cardio-Oncology clinic | Hospital pharmacists                                                                             |
| 19 | Cashman et al. (2020) <sup>22</sup>      | Descriptive study   | Australia                                | To integrate the electronic healthcare delivery systems at a metropolitan hospital and a rural outreach haematology clinic to facilitate streamlined and safe outpatient care                                                                                                       | Hematology outpatients                                                                                                                                                      | Pharmacists specializing in hematology/oncology                                                  |
| 20 | Kjerengtroen et al. (2020) <sup>25</sup> | Descriptive study   | The United States                        | To describe and share the plan developed by Intermountain Medical Center (IMED) in Murray, UT which provides remote clinical pharmacy services to protect the health of pharmacy caregivers while maintaining appropriate clinical pharmacy coverage to optimally care for patients | Hospitalized patients in a quaternary, level I trauma and comprehensive stroke center and patients from off-site locations                                                  | Hospital pharmacists; Pharmacists specializing in critical care, internal medicine or cardiology |
| 21 | Marchese et al. (2021) <sup>27</sup>     | Descriptive study   | Canada                                   | To describe, in a process map, the process changes that were made to the delivery of clinical pharmacy services to ambulatory cancer patients prescribed intravenous anticancer therapies at Odette Cancer Centre in March–April 2020                                               | Patients receiving systemic cancer treatment                                                                                                                                | Pharmacists specializing in oncology                                                             |
| 22 | Park et al. (2021) <sup>41</sup>         | Retrospective study | The United States                        | To describe a quality assurance and performance improvement initiative of the implementation of comprehensive                                                                                                                                                                       | Lung transplant providers (LTP)                                                                                                                                             | Pharmacists specializing in                                                                      |

|    |                                              |                           |             |                                                                                                                                                                                                              |                                                |                                             |
|----|----------------------------------------------|---------------------------|-------------|--------------------------------------------------------------------------------------------------------------------------------------------------------------------------------------------------------------|------------------------------------------------|---------------------------------------------|
|    |                                              |                           |             | medication management visits, pharmacists were able to assist LTP in the transition to telemedicine                                                                                                          |                                                | cardiothoracic (CT) transplant              |
| 23 | Falconer et al. (2021) <sup>42</sup>         | Semi-structured interview | Australia   | To determine the key opportunities for a pharmacist informatician to improve patient care and outcomes during the COVID-19 pandemic                                                                          | Patients with COVID-19                         | Pharmacists specializing in informatics     |
| 24 | Gona et al. (2020) <sup>43</sup>             | Cross-sectional survey    | India       | To assess the clinical pharmacist-initiated telephone-based patient education and self-management support for patients with cardiovascular disease during the nationwide lockdown during COVID-19 pandemic   | Patients with existing cardiovascular diseases | Hospital pharmacists                        |
| 25 | Koster et al. (2021) <sup>45</sup>           | Cross-sectional survey    | Netherlands | To describe the impact of the COVID-19 epidemic on the provision of pharmaceutical care in the Netherlands                                                                                                   | Vulnerable patients                            | Community pharmacists                       |
| 26 | Muflih et al. (2021) <sup>46</sup>           | Cross-sectional survey    | Jordan      | To examine pharmacists' attitudes towards clinical benefits and identify challenges regarding the use of telepharmacy during the COVID-19 pandemic in Jordan                                                 | Patients with COVID-19                         | Community pharmacists; Hospital pharmacists |
| 27 | Tortajada-Goitia et al. (2020) <sup>47</sup> | Cross-sectional survey    | Spain       | To analyze the status of the implementation and development of telepharmacy as applied to the pharmaceutical care of outpatients treated at hospital pharmacy services in Spain during the COVID-19 pandemic | Outpatients                                    | Hospital pharmacists                        |
| 28 | Wang et al. (2021) <sup>48</sup>             | Cross-sectional survey    | China       | To evaluate the usefulness of clinical prevention and control measures of clinical pharmacists at Jiangnan Fangcang Hospital                                                                                 | Patients with chronic diseases                 | Hospital pharmacists                        |

|    |                                             |                        |                            |                                                                                                                                                                                                                           |                                                                                                    |                       |
|----|---------------------------------------------|------------------------|----------------------------|---------------------------------------------------------------------------------------------------------------------------------------------------------------------------------------------------------------------------|----------------------------------------------------------------------------------------------------|-----------------------|
| 29 | Al Meslamani et al. (2021) <sup>49</sup>    | Case series            | Egypt                      | To describe the experience of six hospitals in the management of COVID-19 patients in rural areas through an assessment of proportions, types and clinical outcomes of remote clinical interventions                      | Patients with COVID-19 who lived in rural areas                                                    | Hospital pharmacists  |
| 30 | Ibrahim et al. (2020) <sup>50</sup>         | Case series            | The United States          | To examine differences in rates and types of pharmacist interventions related to COVID-19 and medication dispensing errors (MDEs) across community pharmacies with and without telepharmacy services                      | Patients with suspected or confirmed COVID-19 infection                                            | Community pharmacists |
| 31 | Mohamed Ibrahim et al. (2021) <sup>51</sup> | Case series            | United Arab Emirates (UAE) | To assess the predictors for effective telepharmacy services on increasing access of patients to care and reducing dispensing errors in community pharmacies                                                              | Patients with probable or confirmed COVID-19 infection                                             | Community pharmacists |
| 32 | Cope et al. (2021) <sup>52</sup>            | Retrospective study    | The United States          | To describe the care provided during the COVID-19 pandemic at a pharmacist-run anticoagulation clinic in the New York Metropolitan area and evaluates the impact on clinic outcomes                                       | Outpatients with chronic diseases                                                                  | Hospital pharmacists  |
| 33 | Sorbera et al. (2021) <sup>53</sup>         | Retrospective study    | The United States          | To measure the impact of pharmacy services including telehealth through the percentage of virologically suppressed patients (HIV ribonucleic acid [RNA] < 200 copies/mL) during the pre-COVID and post-COVID time periods | HIV-positive patients                                                                              | Hospital pharmacists  |
| 34 | Huibo Li et al. (2021) <sup>44</sup>        | Cross-sectional survey | China                      | To establish and launch a telepharmacy framework to implement pharmaceutical care during the COVID-19 pandemic.                                                                                                           | Patients with chronic diseases requiring long-term use of medications who were quarantined at home | Pharmacist volunteers |

|    |                                                          |                        |                   |                                                                                                                                                                                                             |                                                                                                                      |                                                          |
|----|----------------------------------------------------------|------------------------|-------------------|-------------------------------------------------------------------------------------------------------------------------------------------------------------------------------------------------------------|----------------------------------------------------------------------------------------------------------------------|----------------------------------------------------------|
| 35 | Ana Peláez Bejarano, et al. (2021) <sup>54</sup>         | Cross-sectional survey | Spanish           | To design a model that would facilitate access to hospital medication during home quarantine due to COVID-19, and ensure patient satisfaction with this process                                             | Patients with acute illnesses or complex chronic conditions who were confined to home quarantine due to the pandemic | Community pharmacists; Hospital pharmacists              |
| 36 | Anusha McNamara, et al. (2021) <sup>55</sup>             | Retrospective study    | The United States | To evaluate the impact of clinical pharmacist care via in-person and telehealth by comparing the average MRPs resolved during the visits                                                                    | Patients and individuals regardless of insurance status                                                              | Hospital pharmacists                                     |
| 37 | Najla J. Alhraiwil, et al.(2021) <sup>56</sup>           | Descriptive study      | Saudi Arabia      | To understand the impact of the COVID-19 pandemic on Call Center services, specifically medical consultations, to suggest future recommendations for patient care optimization                              | Citizens, residents, and visitors                                                                                    | Pharmacists                                              |
| 38 | Syed Iqbal Mohiuddin, et al. (2021) <sup>57</sup>        | Descriptive study      | Saudi Arabia      | To emphasize the implementation of the pharmacist-led medication management clinic services in the Johns Hopkins Aramco Healthcare (JHAH) ambulatory pharmacy care setting using communication technologies | Geriatric patients with chronic conditions                                                                           | Clinic pharmacists responsible for medication management |
| 39 | Zhiling Li, et al. (2021) <sup>58</sup>                  | Descriptive study      | China             | To share our strategies and efforts with peers who are fighting against COVID-19 in other countries and regions                                                                                             | Pediatric patients with COVID-19                                                                                     | Hospital pharmacists                                     |
| 40 | Patrycja Grosman-Dziewiszek, et al. (2021) <sup>59</sup> | Cross-sectional survey | Poland            | To investigate the new coronavirus disease 's effect on patients' health habits, access to healthcare, and attitude to vaccination                                                                          | Patients in general                                                                                                  | Hospital pharmacists                                     |
| 41 | Rania Itani, et al. (2021) <sup>60</sup>                 | Cross-sectional survey | Lebanon           | To identify the pharmaceutical care provided by community pharmacists to suspected high-risk COVID-19 patients using telehealth                                                                             | Elderly individuals and those with underlying chronic medical conditions                                             | Community pharmacists                                    |

---

|    |                                               |                   |                                            |                                                                                                                                                                                                                                                           |                                                    |                       |
|----|-----------------------------------------------|-------------------|--------------------------------------------|-----------------------------------------------------------------------------------------------------------------------------------------------------------------------------------------------------------------------------------------------------------|----------------------------------------------------|-----------------------|
| 42 | Maha Al Ammari, et al. (2021) <sup>61</sup>   | Prospective study | Saudi Arabia                               | To assess the tele-pharmacy anticoagulation clinic's efficiency and patient satisfaction in Saudi Arabia during the COVID-19 pandemic                                                                                                                     | Patients with diabetes mellitus and hypertension   | Hospital pharmacists  |
| 43 | Milena Kovačević, et al. (2021) <sup>62</sup> | Descriptive study | Republic of Srpska, Bosnia and Herzegovina | To describe the remote pharmaceutical care service (telepharmacy) during the COVID-19 pandemic in the Republic of Srpska (RS), Bosnia and Herzegovina; To identify service users' needs and concerns and to describe community pharmacists' interventions | Patients with chronic or acute/subacute conditions | Community pharmacists |

---
