# Supplementary material for: Systematic literature review of adopting eHealth in pharmaceutical care during COVID-19 pandemic: recommendations for strengthening pharmacy services
Source: PubMed Central journal article supplement — BMJ Open. 2022 Nov 23;12(11):e066246. doi: 10.1136/bmjopen-2022-066246 (PMC9684285; doi:10.1136/bmjopen-2022-066246), 2022-11-23
Supplement: bmjopen-2022-066246supp003.pdf [file bmjopen-2022-066246supp003.pdf]

## Supplementary file 1

**A systematic literature review of adopting eHealth in pharmaceutical care during COVID-19 pandemic:  
recommendations for strengthening pharmacy services**

**Literature search strategy**

**Table 1. Overall literature search strategy**

| Concept 1                                                                              |            | Concept 2                                                                                                                                                                                                                                                                                        |            | Concept 3                                                                                                                                                       | Limits                                                                                                                                                                                                                                                                                                                                                                                                                                                                                                                                                                                                                                                                                                                                                                                                                                                                                    |
|----------------------------------------------------------------------------------------|------------|--------------------------------------------------------------------------------------------------------------------------------------------------------------------------------------------------------------------------------------------------------------------------------------------------|------------|-----------------------------------------------------------------------------------------------------------------------------------------------------------------|-------------------------------------------------------------------------------------------------------------------------------------------------------------------------------------------------------------------------------------------------------------------------------------------------------------------------------------------------------------------------------------------------------------------------------------------------------------------------------------------------------------------------------------------------------------------------------------------------------------------------------------------------------------------------------------------------------------------------------------------------------------------------------------------------------------------------------------------------------------------------------------------|
| pharm*<br><b>OR</b><br>pharmacy<br><b>OR</b><br>pharmacies<br><b>OR</b><br>Pharmacist* | <b>AND</b> | Tele*<br><b>OR</b><br>mHealth<br><b>OR</b><br>m-Health<br><b>OR</b><br>mobile Health<br><b>OR</b><br>electronic Health<br><b>OR</b><br>eHealth<br><b>OR</b><br>e-Health<br><b>OR</b><br>e-medicine<br><b>OR</b><br>eMedicine<br><b>OR</b><br>electronic medicine<br><b>OR</b><br>mobile medicine | <b>AND</b> | COVID-19<br><b>OR</b><br>COVID 19<br><b>OR</b><br>Coronavirus<br><b>OR</b><br>2019-ncov<br><b>OR</b><br>SARS-CoV-2<br><b>OR</b><br>Sars2<br><b>OR</b><br>cov-19 | <p><b>Inclusion criteria:</b></p> <ul style="list-style-type: none"> <li>• Studies which reported the use of eHealth in any aspects of PC during the COVID-19 pandemic, published between December 2019 and March 2022, written in English or Chinese, and published in peer-reviewed journals were included.</li> <li>• The study types were limited to descriptive studies, prospective observational studies, retrospective cohort studies, retrospective chart reviews, cross-sectional surveys, and qualitative studies.</li> </ul> <p><b>Exclusion criteria:</b></p> <ul style="list-style-type: none"> <li>• Studies which reported about the use of eHealth to support the use of medicines during the COVID-19 pandemic by healthcare professionals other than pharmacists</li> <li>• opinion articles, conference abstracts, correspondence, letters, and editorials</li> </ul> |

**Table 2. Search Strategies used for each database**

| Source         | Search syntax                                                                                                                                                                                                                                                        | Hits<br>(15 April 2022) |
|----------------|----------------------------------------------------------------------------------------------------------------------------------------------------------------------------------------------------------------------------------------------------------------------|-------------------------|
| PubMed         | (covid-19 OR covid19 OR coronavirus OR 2019-ncov OR sars-cov-2 OR sars2 OR cov-19) AND (tele* OR mobile health OR mhealth OR m-health OR electronic health OR ehealth OR e-health OR e-medicine OR eMedicine OR electronic medicine OR mobile medicine) AND (pharm*) | 304                     |
| Scopus         | (covid-19 OR covid19 OR coronavirus OR 2019-ncov OR sars-cov-2 OR sars2 OR cov-19) AND (tele* OR mobile health OR mhealth OR m-health OR electronic health OR ehealth OR e-health OR e-medicine OR eMedicine OR electronic medicine OR mobile medicine) AND (pharm*) | 464                     |
| MEDILINE       | (covid-19 OR covid19 OR coronavirus OR 2019-ncov OR sars-cov-2 OR sars2 OR cov-19) AND (tele* OR mobile health OR mhealth OR m-health OR electronic health OR ehealth OR e-health OR e-medicine OR eMedicine OR electronic medicine OR mobile medicine) AND (pharm*) | 102                     |
| Web of Science | (covid-19 OR covid19 OR coronavirus OR 2019-ncov OR sars-cov-2 OR sars2 OR cov-19) AND (tele* OR mobile health OR mhealth OR m-health OR electronic health OR ehealth OR e-health OR e-medicine OR eMedicine OR electronic medicine OR mobile medicine) AND (pharm*) | 298                     |
| Science Direct | (covid-19 OR coronavirus) AND (telemedicine OR telehealth OR "m-health" OR "e-health") AND (pharmacy OR pharmacist)                                                                                                                                                  | 12                      |
| CNKI           | (新冠*) AND (远程医疗*) AND (药师*)                                                                                                                                                                                                                                          | 1                       |

**Table 3: Search history in PubMed (15 April 2022)**

| Search No.                                             | Search terms                                                                                                                                                                                                                                                                                                                                   | Hits   |
|--------------------------------------------------------|------------------------------------------------------------------------------------------------------------------------------------------------------------------------------------------------------------------------------------------------------------------------------------------------------------------------------------------------|--------|
| <b>Pharmacy practice</b>                               |                                                                                                                                                                                                                                                                                                                                                |        |
| #1                                                     | Pharm*[Title/Abstract]                                                                                                                                                                                                                                                                                                                         | 898177 |
| <b>eHealth</b>                                         |                                                                                                                                                                                                                                                                                                                                                |        |
| #2                                                     | Tele*[Title/Abstract] OR mHealth[Title/Abstract] OR m-Health[Title/Abstract] OR mobile Health[Title/Abstract] OR electronic Health[Title/Abstract] OR eHealth[Title/Abstract] OR e-Health[Title/Abstract] OR e-medicine[Title/Abstract] OR eMedicine[Title/Abstract] OR electronic medicine[Title/Abstract] OR mobile medicine[Title/Abstract] | 220321 |
| <b>COVID-19</b>                                        |                                                                                                                                                                                                                                                                                                                                                |        |
| #3                                                     | COVID-19[Title/Abstract] OR COVID 19[Title/Abstract] OR Coronavirus[Title/Abstract] OR 2019-ncov[Title/Abstract] OR SARS-CoV-2[Title/Abstract] OR Sars2[Title/Abstract] OR cov-19[Title/Abstract]                                                                                                                                              | 223313 |
| <b>Limits (English, Chinese; full text; 2020-2022)</b> |                                                                                                                                                                                                                                                                                                                                                |        |
| <b>Total</b>                                           |                                                                                                                                                                                                                                                                                                                                                |        |
| #4                                                     | #1 AND #2 AND #3 Filters: English, Chinese, 2020-2022                                                                                                                                                                                                                                                                                          | 304    |

**Table 4: Search history in Scopus (15 April 2022)**

| Search No.                                  | Search terms                                                                                                                                                                                                   | Hits    |
|---------------------------------------------|----------------------------------------------------------------------------------------------------------------------------------------------------------------------------------------------------------------|---------|
| <b>Pharmacy practice</b>                    |                                                                                                                                                                                                                |         |
| #1                                          | TITLE-ABS-KEY ( "pharm*" )                                                                                                                                                                                     | 1653497 |
| <b>eHealth</b>                              |                                                                                                                                                                                                                |         |
| #2                                          | TITLE-ABS-KEY ( "tele*" OR "mobile health" OR "mhealth" OR "m-health" OR "electronic health" OR "ehealth" OR "e-health" OR "e-medicine" OR eMedicine OR "electronic medicine" OR "mobile medicine" )           | 1286160 |
| <b>COVID-19</b>                             |                                                                                                                                                                                                                |         |
| #3                                          | TITLE-ABS-KEY ( "covid-19" OR "covid19" OR "coronavirus" OR "2019-ncov" OR "sars-cov-2" OR "sars2" OR "cov-19" )                                                                                               | 304284  |
| <b>Limits (English, Chinese; 2020-2022)</b> |                                                                                                                                                                                                                |         |
| #4                                          | LIMIT-TO ( PUBYEAR , 2021 ) OR LIMIT-TO ( PUBYEAR , 2020 ) ) AND ( LIMIT-TO ( DOCTYPE , "ar" ) OR LIMIT-TO ( DOCTYPE , "re" ) ) AND ( LIMIT-TO ( LANGUAGE , "English" ) OR LIMIT-TO ( LANGUAGE , "Chinese" ) ) |         |
| <b>Total</b>                                |                                                                                                                                                                                                                |         |
| #5                                          | #1 AND #2 AND #3 AND #4                                                                                                                                                                                        | 464     |

**Table 5: Search history in MEDLINE (15 April 2022)**

| Search No.                                  | Search terms                                                                                                                                                                                                                                                                                                                                                                                                                                   | Hits   |
|---------------------------------------------|------------------------------------------------------------------------------------------------------------------------------------------------------------------------------------------------------------------------------------------------------------------------------------------------------------------------------------------------------------------------------------------------------------------------------------------------|--------|
| <b>Pharmacy practice</b>                    |                                                                                                                                                                                                                                                                                                                                                                                                                                                |        |
| #1                                          | TI "pharm*" OR AB "pharm*"                                                                                                                                                                                                                                                                                                                                                                                                                     | 241703 |
| <b>eHealth</b>                              |                                                                                                                                                                                                                                                                                                                                                                                                                                                |        |
| #2                                          | TI "tele*" OR AB "tele*" OR TI "mobile health" OR AB "mobile health" OR TI "mhealth" OR AB "mhealth" OR TI "m-health" OR AB "m-health" OR TI "electronic health" OR AB "electronic health" OR TI "ehealth" OR AB "ehealth" OR TI "e-health" OR AB "e-health" OR TI "e-medicine" OR AB "e-medicine" OR TI "eMedicine" OR AB "eMedicine" OR TI "electronic medicine" OR AB "electronic medicine" OR TI "mobile medicine" OR AB "mobile medicine" | 71583  |
| <b>COVID-19</b>                             |                                                                                                                                                                                                                                                                                                                                                                                                                                                |        |
| #3                                          | TI "covid-19" OR AB "covid-19" OR TI "covid19" OR AB "covid19" OR TI "coronavirus" OR AB "coronavirus" OR TI "2019-ncov" OR AB "2019-ncov" OR TI "sars-cov-2" OR AB "sars-cov-2" OR TI "sars2" OR AB "sars2" OR TI "cov-19" OR AB "cov-19"                                                                                                                                                                                                     | 78144  |
| <b>Limits (English, Chinese; 2020-2022)</b> |                                                                                                                                                                                                                                                                                                                                                                                                                                                |        |
| <b>Total</b>                                |                                                                                                                                                                                                                                                                                                                                                                                                                                                |        |
| #4                                          | #1 AND #2 AND #3                                                                                                                                                                                                                                                                                                                                                                                                                               | 102    |

**Table 6: Search history in Web of Science (15 April 2022)**

| Search No.                                  | Search terms                                                                                                                                                                              | Hits    |
|---------------------------------------------|-------------------------------------------------------------------------------------------------------------------------------------------------------------------------------------------|---------|
| <b>Pharmacy practice</b>                    |                                                                                                                                                                                           |         |
| #1                                          | TS=("pharm*")                                                                                                                                                                             | 1004569 |
| <b>eHealth</b>                              |                                                                                                                                                                                           |         |
| #2                                          | TS=("tele*" or "mobile health" or "mhealth" or "m-health" or "electronic health" or "ehealth" or "e-health" or "e-medicine" or "eMedicine" or "electronic medicine" or "mobile medicine") | 583377  |
| <b>COVID-19</b>                             |                                                                                                                                                                                           |         |
| #3                                          | TS=("covid-19" or "covid19" or "coronavirus" or "2019-ncov" or "sars-cov-2" or "sars2" or "cov-19")                                                                                       | 256873  |
| <b>Limits (English, Chinese; 2020-2022)</b> |                                                                                                                                                                                           |         |
| <b>Total</b>                                |                                                                                                                                                                                           |         |
| #4                                          | #1 AND #2 AND #3                                                                                                                                                                          | 298     |

**Table 7: Search history in Science Direct (15 April 2022)**

| Search No.                | Search terms                                         | Hits  |
|---------------------------|------------------------------------------------------|-------|
| <b>Pharmacy practice</b>  |                                                      |       |
| #1                        | pharmacy OR pharmacist                               | 25083 |
| <b>eHealth</b>            |                                                      |       |
| #2                        | telemedicine OR telehealth OR“m-health” OR“e-health” | 6377  |
| <b>COVID-19</b>           |                                                      |       |
| #3                        | covid-19 OR coronavirus                              | 45052 |
| <b>Limits (2020-2021)</b> |                                                      |       |
| <b>Total</b>              |                                                      |       |
| #4                        | #1 AND #2 AND #3                                     | 12    |

**Table 8: Search history in CNKI (15 April 2022)**

| Search No.                                  | Search terms     | Hits   |
|---------------------------------------------|------------------|--------|
| <b>Pharmacy practice</b>                    |                  |        |
| #1                                          | 药师*              | 36900  |
| <b>eHealth</b>                              |                  |        |
| #2                                          | 远程*              | 257144 |
| <b>COVID-19</b>                             |                  |        |
| #3                                          | 新冠*              | 34612  |
| <b>Limits (English, Chinese; 2020-2022)</b> |                  |        |
| <b>Total</b>                                |                  |        |
| #4                                          | #1 AND #2 AND #3 | 1      |
